# Supplementary material for: Systemic Inflammatory and Metabolic Risk Factors for Early Periprosthetic Osteolysis After Total Knee Arthroplasty: A Predictive Biomarker Study
Source: Research Square preprint supplement (doi:10.21203/rs.3.rs-7633068/v1), 2025-11-02
Supplement: Supplementary file 1 [file 0260b2d13896b7c52b648182.docx]

**Table 1. Baseline Characteristics of the Study Population (n = 375)**

| Variable | Total (n = 375) | Non-osteolysis (n = 358) | Osteolysis (n = 17) | P-value |
| --- | --- | --- | --- | --- |
| Age, mean ± SD (years) | 63.00 ± 9.49 | 62.74 ± 9.39 | 68.47 ± 10.18 | 0.015 |
| Sex, n (%) |  |  |  | 1.000 |
| Male | 85 (22.67%) | 81 (22.63%) | 4 (23.53%) |  |
| Female | 290 (77.33%) | 277 (77.37%) | 13 (76.47%) |  |
| BMI, mean ± SD (kg/m²) | 25.36 ± 3.61 | 25.31 ± 3.62 | 26.48 ± 3.28 | 0.193 |
| Diabetes status, n (%) |  |  |  | 0.008 |
| No diabetes | 330 (88.00%) | 318 (88.83%) | 12 (70.59%) |  |
| With diabetes, no complications | 35 (9.33%) | 33 (9.22%) | 2 (11.76%) |  |
| With diabetes + complications | 10 (2.67%) | 7 (1.96%) | 3 (17.65%) |  |
| Hypertension, n (%) |  |  |  | 0.778 |
| No | 186 (49.60%) | 177 (49.44%) | 9 (52.94%) |  |
| Yes | 189 (50.40%) | 181 (50.56%) | 8 (47.06%) |  |

Note: Data are presented as mean ± standard deviation or number (%). Statistical significance was evaluated using t-test for continuous variables and chi-square test for categorical variables.
