# Supplementary material for: Systemic Inflammatory and Metabolic Risk Factors for Early Periprosthetic Osteolysis After Total Knee Arthroplasty: A Predictive Biomarker Study
Source: Research Square preprint supplement (doi:10.21203/rs.3.rs-7633068/v1), 2025-11-02
Supplement: Supplementary file 2 [file 2dce80de49ef2ad99a248194.docx]

**Table2. Univariate Logistic Regression Variables**

**Significant Variables (P < 0.05)**

| **Variable** | **OR (95% CI)** | **P value** |
| --- | --- | --- |
| Leukocyte count (WBC) | 1.68 (1.20–2.36) | **0.003*** |
| Monocyte count | 1.62 (1.18–2.23) | **0.003*** |
| SIRI (Systemic Inflammation Response Index) | 1.45 (1.13–1.86) | **0.003*** |
| Diabetes group/status | 2.93 (1.43–6.02) | **0.003*** |
| Neutrophil count | 1.60 (1.17–2.19) | **0.004*** |
| PIV (pan-immune-inflammation value) | 1.40 (1.09–1.81) | **0.010*** |
| Age | 2.25 (1.21–4.16) | **0.010*** |
| FIB-4 index | 1.55 (1.10–2.16) | **0.011*** |
| UACR (Uric Acid to Creatinine Ratio) | 0.47 (0.26–0.87) | **0.016*** |
| Creatinine | 1.39 (1.06–1.83) | **0.016*** |
| ALT/AST ratio | 0.48 (0.25–0.94) | **0.033*** |
| Direct bilirubin | 1.53 (1.02–2.28) | **0.038*** |

OR: Odds Ratio, CI: Confidence Interval

**Non-significant Variables (P ≥ 0.05)**

| **Variable** | **OR (95% CI)** | **P value** |
| --- | --- | --- |
| Cystatin C | 1.33 (0.99–1.77) | 0.055 |
| Neutrophil percentage | 1.53 (0.96–2.43) | 0.071 |
| SII (Systemic Immune-Inflammation Index) | 1.31 (0.97–1.76) | 0.074 |
| Adenosine deaminase | 1.35 (0.96–1.90) | 0.082 |
| NLR (neutrophil/lymphocyte ratio) | 1.27 (0.97–1.68) | 0.086 |
| Lymphocyte percentage | 0.66 (0.41–1.07) | 0.091 |
| Mean platelet volume (MPV) | 1.44 (0.93–2.22) | 0.104 |
| APRI (Aspartate aminotransferase-to-platelet ratio index) | 1.29 (0.94–1.77) | 0.110 |
| Urea/creatinine ratio | 0.61 (0.34–1.12) | 0.111 |
| Large platelet ratio | 1.43 (0.92–2.23) | 0.113 |
| Indirect bilirubin | 0.61 (0.33–1.14) | 0.120 |
| Chloride | 0.70 (0.44–1.10) | 0.123 |
| Alkaline phosphatase (ALP) | 0.54 (0.23–1.26) | 0.152 |
| BMI (body mass index) | 1.41 (0.85–2.35) | 0.187 |
| LDL cholesterol | 0.73 (0.43–1.21) | 0.219 |
| Creatine kinase-MB | 0.64 (0.31–1.32) | 0.225 |
| BMI grade | 1.39 (0.79–2.44) | 0.252 |
| Sodium | 1.34 (0.81–2.23) | 0.254 |
| Eosinophil percentage (EDTA anticoagulated) | 0.67 (0.34–1.34) | 0.258 |
| Alpha-L-fucosidase | 0.73 (0.42–1.26) | 0.260 |
| Weight | 1.30 (0.81–2.10) | 0.276 |
| HALP score | 1.25 (0.83–1.89) | 0.282 |
| Monoamine oxidase | 0.75 (0.44–1.27) | 0.284 |
| ALBI grade | 1.48 (0.72–3.04) | 0.284 |
| Triglycerides | 0.70 (0.36–1.37) | 0.302 |
| Magnesium | 1.27 (0.80–2.02) | 0.307 |
| Red blood cell count | 0.79 (0.50–1.25) | 0.313 |
| Platelet distribution width | 1.25 (0.80–1.97) | 0.325 |
| Immature granulocyte count | 1.15 (0.86–1.54) | 0.341 |
| C-reactive protein (CRP) | 0.43 (0.08–2.46) | 0.344 |
| CAR (C-reactive protein/albumin ratio) | 0.45 (0.08–2.48) | 0.362 |
| Lipoprotein(a) | 0.65 (0.25–1.71) | 0.380 |
| LMR (lymphocyte/monocyte ratio) | 0.76 (0.41–1.40) | 0.380 |
| Amylase | 1.20 (0.79–1.81) | 0.395 |
| Hemoglobin | 0.82 (0.52–1.30) | 0.404 |
| Hematocrit | 0.83 (0.52–1.30) | 0.406 |
| Blood urea | 1.18 (0.78–1.77) | 0.437 |
| GGT/ALP ratio | 1.18 (0.78–1.79) | 0.439 |
| Complement C1q | 0.81 (0.48–1.38) | 0.440 |
| Aspartate aminotransferase (AST) | 1.14 (0.80–1.63) | 0.472 |
| Uric acid/fasting glucose ratio | 0.82 (0.48–1.40) | 0.476 |
| ALBI score | 1.21 (0.71–2.05) | 0.488 |
| Follow-up interval (days) | 1.14 (0.75–1.75) | 0.538 |
| Prealbumin | 0.83 (0.47–1.49) | 0.540 |
| Potassium | 1.16 (0.71–1.90) | 0.544 |
| GFR (glomerular filtration rate) | 0.85 (0.51–1.44) | 0.552 |
| Red cell distribution width-SD | 1.13 (0.75–1.72) | 0.560 |
| Mean corpuscular volume (MCV) | 1.15 (0.71–1.87) | 0.577 |
| Albumin/globulin ratio | 0.87 (0.53–1.43) | 0.578 |
| Bile acid | 1.12 (0.74–1.68) | 0.598 |
| Apolipoprotein A-I | 1.13 (0.70–1.83) | 0.606 |
| Basophil percentage (EDTA anticoagulated) | 6.19E-12 (2.09E-55–1.83E+32) | 0.613 |
| Red cell distribution width-CV | 0.87 (0.51–1.49) | 0.620 |
| Lactate dehydrogenase (LDH) | 1.12 (0.71–1.78) | 0.626 |
| Total cholesterol | 0.88 (0.54–1.46) | 0.629 |
| Alpha-hydroxybutyrate dehydrogenase | 1.12 (0.70–1.78) | 0.632 |
| Mean corpuscular hemoglobin (MCH) | 1.13 (0.68–1.87) | 0.634 |
| Gamma-glutamyltransferase (GGT) | 0.79 (0.28–2.18) | 0.644 |
| PALBI score | 1.12 (0.68–1.86) | 0.649 |
| Creatine kinase | 1.07 (0.71–1.61) | 0.734 |
| Apolipoprotein B | 0.92 (0.56–1.51) | 0.735 |
| Lymphocyte count | 1.07 (0.67–1.72) | 0.772 |
| Eosinophil count (EDTA anticoagulated) | 0.92 (0.53–1.60) | 0.777 |
| Hypertension | 0.87 (0.33–2.30) | 0.778 |
| PAR (platelet/albumin ratio) | 0.93 (0.57–1.53) | 0.782 |
| Phosphate | 1.06 (0.66–1.71) | 0.811 |
| Globulin | 1.06 (0.66–1.70) | 0.821 |
| GPS | 0.84 (0.19–3.79) | 0.821 |
| Basophil count (EDTA anticoagulated) | 1.05 (0.66–1.68) | 0.831 |
| Uric acid/albumin ratio | 0.95 (0.57–1.57) | 0.835 |
| BMI group | 1.08 (0.51–2.30) | 0.837 |
| Height | 0.87 (0.22–3.46) | 0.839 |
| Platelet count | 0.95 (0.58–1.55) | 0.843 |
| Calcium | 0.96 (0.61–1.51) | 0.858 |
| Monocyte percentage | 1.04 (0.64–1.67) | 0.886 |
| Mean corpuscular hemoglobin concentration (MCHC) | 0.97 (0.59–1.57) | 0.887 |
| PLR (platelet/lymphocyte ratio) | 0.97 (0.59–1.59) | 0.898 |
| Fasting blood glucose | 1.03 (0.65–1.64) | 0.904 |
| HDL cholesterol | 1.03 (0.64–1.66) | 0.905 |
| Total protein | 1.03 (0.63–1.67) | 0.918 |
| Alanine aminotransferase (ALT) | 0.98 (0.59–1.62) | 0.922 |
| Uric acid | 0.98 (0.60–1.60) | 0.924 |
| PNI (prognostic nutritional index) | 1.02 (0.63–1.67) | 0.926 |
| Homocysteine | 0.98 (0.59–1.61) | 0.926 |
| Serum iron | 0.98 (0.60–1.60) | 0.931 |
| Sex | 0.95 (0.30–2.99) | 0.931 |
| Albumin | 0.98 (0.61–1.60) | 0.943 |
| Immature granulocyte percentage | 0.98 (0.59–1.63) | 0.945 |
| Plateletcrit | 1.01 (0.62–1.65) | 0.958 |
| Total bilirubin | 0.99 (0.61–1.61) | 0.960 |
| GPR (Gamma-glutamyl transpeptidase to platelet ratio) | 0.99 (0.60–1.64) | 0.979 |
| Uric acid-CRP index | 1.00 (0.61–1.63) | 0.988 |
| Uric acid/HDL ratio | 1.00 (0.62–1.63) | 0.997 |

OR: Odds Ratio, CI: Confidence Interval
