# Supplementary material for: Systemic Inflammatory and Metabolic Risk Factors for Early Periprosthetic Osteolysis After Total Knee Arthroplasty: A Predictive Biomarker Study
Source: Research Square preprint supplement (doi:10.21203/rs.3.rs-7633068/v1), 2025-11-02
Supplement: Supplementary file 3 [file 5f137fcdd60d23a887b5773c.docx]

**Table3.Multivariable Logistic Regression Analysis Results: Factors Associated with the Occurrence of periprosthetic osteolysis**

| Variable | β | S.E |  | OR (95%CI) | *P* |
| --- | --- | --- | --- | --- | --- |
|  |
| Leukocyte count (WBC) | 0.38 | 0.11 |  | 1.47 (1.19-1.80) | **<0.001** |  |
| BMI | 0.21 | 0.09 |  | 1.24 (1.03-1.49) | **0.021** |  |
| Uric Acid to Creatinine Ratio,（UACR） | -0.68 | 0.25 |  | 0.51 (0.31- 0.82) | **0.006** |  |
| FIB-4 index | 0.73 | 0.27 |  | 2.08 (1.23-3.52) | **0.006** |  |

OR: Odds Ratio, CI: Confidence Interval
