# Supplementary material for: Systemic Inflammatory and Metabolic Risk Factors for Early Periprosthetic Osteolysis After Total Knee Arthroplasty: A Predictive Biomarker Study
Source: Research Square preprint supplement (doi:10.21203/rs.3.rs-7633068/v1), 2025-11-02
Supplement: Supplementary file 4 [file ac04d4bbee788b17925612ea.docx]

**Supplementary Table1. Gender Subgroup Analysis**

| **Variable** | **Men** | | **Women** | |
| --- | --- | --- | --- | --- |
| **OR(95%CI)** | **P** | **OR(95%CI)** | **P** |
| **UACR** | 0.23(0.03-0.70) | 0.05 | 0.54(0.28-0.96) | 0.05 |
| **WBC** | 1.66(1.01-3.11) | 0.06 | 1.58(1.20-2.12) | <0.01 |
| **FIB-4-index** | 1.08(0.23-2.77) | 0.88 | 3.10(1.63-5.97) | <0.01 |
| **BMI** | 1.36(0.88-2.78) | 0.26 | 1.28(1.03-1.62) | 0.03 |

OR: Odds Ratio, CI: Confidence Interval

**Supplementary Table2.Age Subgroup Analysis**

| **Variable** | ≤50 | | 50-65 | | ≥65 | |
| --- | --- | --- | --- | --- | --- | --- |
| **OR (95%CI)** | P | **OR (95%CI)** | P | **OR (95%CI)** | P |
| WBC | 0.86 (0.09-3.09) | 0.84 | 1.18 (0.70-1.66) | 0.42 | 1.74(1.27-2.52) | <0.01 |
| FIB-4 index | 0.77 (0.00-4478) | 0.95 | 1.20 (0.22-3.44) | 0.79 | 2.33(1.08-6.28) | 0.06 |
| BMI | 1.24 (0.70-2.83) | 0.45 | 1.10 (0.84-1.48) | 0.50 | 1.32(1.01-1.78) | 0.05 |
| UACR | 1.55(0.15-61.3) | 0.75 | 0.56 (0.20-1.24) | 0.22 | 0.38 (0.17-0.72) | 0.01 |

OR: Odds Ratio, CI: Confidence Interval

**Supplementary Table3. Diabetes Subgroup Analysis**

| **Variable** | **NoDiabetes** | | **Diabetes** | |
| --- | --- | --- | --- | --- |
| **OR (95%CI)** | **P** | **OR (95%CI)** | **P** |
| **UACR** | 0.54(0.28-0.96) | 0.05 | 0.13(0.01-0.61) | 0.05 |
| **WBC** | 1.58(1.20-2.12) | <0.01 | 1.91(0.95-6.17) | 0.14 |
| **FIB-4-index** | 3.10(1.63-5.97 ) | <0.01 | 6.83(1.43-76.87) | 0.04 |
| **BMI** | 1.28(1.03-1.62) | 0.03 | 1.50(0.83-3.49) | 0.24 |

OR: Odds Ratio, CI: Confidence Interval

**Supplementary Table4. Hypertension Subgroup Analysis**

| **Variable** | **NoHypertension** | | **Hypertension** | |
| --- | --- | --- | --- | --- |
| **OR (95%CI)** | **P** | **OR (95%CI)** | **P** |
| **UACR** | 0.74(0.37–1.26) | 0.328 | 0.32(0.13–0.65) | 0.005 |
| **WBC** | 1.47(1.05–2.06) | 0.020 | 1.64(1.18–2.36) | 0.003 |
| **FIB-4-index** | 2.60(1.19–5.50) | 0.011 | 1.96(0.94–4.89) | 0.091 |
| **BMI** | 1.25(0.99–1.61) | 0.064 | 1.35(0.99–1.90) | 0.067 |

OR: Odds Ratio, CI: Confidence Interval
